# Supplementary material for: An all-rounder aminoguanidine based ligand, its unusual anionic zinc(ii) and cadmium(ii) coordination complexes and their biological implications
Source: Royal Society of Chemistry journal article supplement (doi:10.1039/d4nj00446a), 2024-01-01
Supplement: d4nj00446a1.pdf [file d4nj00446a1.pdf]

**Supplementary Information for:**

**An All-rounder Aminoguanidine based Ligand, Its Unusual  
Anionic Zinc(II) and Cadmium(II) Coordination Complexes and  
Their Biological Implications**

Ansa Santu<sup>a</sup>, K. K. Mohammed Hashim<sup>a</sup>, E. Manoj<sup>a\*</sup>

<sup>a</sup>*Department of Applied Chemistry, CUSAT, Kochi, Kerala 682 022, India*

\*[manoj@cusat.ac.in](mailto:manoj@cusat.ac.in)

| Sl. No. | Contents                                                                                                                                                                                                  | Page no. |
|---------|-----------------------------------------------------------------------------------------------------------------------------------------------------------------------------------------------------------|----------|
| 1       | <b>Figure S1.</b> Mass spectrum of $[\text{ZnCl}_2(\text{H}_4\text{Brsal-dag})]\text{H}_6\text{Brsal-dag}.\text{DMF}.\text{H}_2\text{O}$ ( <b>1</b> ) with experimental and calculated isotopic patterns. | S4       |
| 2       | <b>Figure S2.</b> Mass spectrum of $[\text{CdCl}_2(\text{H}_4\text{Brsal-dag})]\text{H}_6\text{Brsal-dag}.\text{DMF}.\text{H}_2\text{O}$ ( <b>2</b> ) with experimental and calculated isotopic patterns. | S4       |
| 3       | <b>Figure S3.</b> Experimental (a) and theoretical (b) IR spectra of the complex <b>1</b> .                                                                                                               | S5       |
| 4       | <b>Figure S4.</b> Experimental (a) and theoretical (b) IR spectra of the complex <b>2</b> .                                                                                                               | S5       |
| 5       | <b>Figure S5.</b> Experimental (a) and theoretical (b) Far IR spectra of the complex <b>1</b> .                                                                                                           | S5       |
| 6       | <b>Figure S6.</b> Experimental (a) and theoretical (b) Far IR spectra of the complex <b>2</b> .                                                                                                           | S6       |
| 7       | <b>Figure S7.</b> UV-vis spectra of the ligand, complex <b>1</b> and complex <b>2</b> .                                                                                                                   | S6       |
| 8       | <b>Figure S8.</b> Unit cell packing diagrams of a) complex <b>1</b> and b) complex <b>2</b> along 'a' axis, showing relevant hydrogen bonding interactions (blue dotted lines).                           | S6       |
| 9       | <b>Figure S9.</b> 2D Fingerprint plots showing the percentages of contacts contributed to the total Hirshfeld surface area of the complex <b>1</b> (below) and the complex <b>2</b> (above).              | S7       |
| 10      | <b>Figure S10.</b> Relative contributions of various intermolecular contacts to the Hirshfeld surface area in a) complex <b>1</b> & b) complex <b>2</b> .                                                 | S7       |
| 11      | <b>Figure S11.</b> MEP plots for (a) ligand, (b) complex <b>1</b> and (c) complex <b>2</b> .                                                                                                              | S7       |
| 12      | <b>Figure S12.</b> PXRD (left) and simulated PXRD pattern from SC-XRD (right) of (a) complex <b>1</b> and (b) complex <b>2</b> .                                                                          | S8       |
| 13      | <b>Figure S13.</b> Zone of inhibition of (a) <i>S. aureus</i> (b) <i>E. coli</i> against ligand, complex <b>1</b> and complex <b>2</b> .                                                                  | S8       |
| 14      | <b>Figure S14.</b> Binding mode of $[\text{ZnCl}_2(\text{H}_4\text{Brsal-dag})]^-$ and its focused view of interactions with 1BNA.                                                                        | S9       |
| 15      | <b>Figure S15.</b> Binding mode of $[\text{CdCl}_2(\text{H}_4\text{Brsal-dag})]^-$ and its focused                                                                                                        | S9       |

|    |                                                                                                                                                                                                                                                                                                                            |     |
|----|----------------------------------------------------------------------------------------------------------------------------------------------------------------------------------------------------------------------------------------------------------------------------------------------------------------------------|-----|
|    | view of interactions with 1BNA.                                                                                                                                                                                                                                                                                            |     |
| 16 | <b>Figure S16.</b> Binding mode of $[\text{ZnCl}_2(\text{H}_4\text{Brsal-dag})]^-$ and its focused view of interactions with DHFR from <i>S. aureus</i> .                                                                                                                                                                  | S10 |
| 17 | <b>Figure S17.</b> 2D representation of (a) $[\text{ZnCl}_2(\text{H}_4\text{Brsal-dag})]^-$ and (b) $[\text{CdCl}_2(\text{H}_4\text{Brsal-dag})]^-$ at the active site residues of DHFR from <i>S. aureus</i> .                                                                                                            | S10 |
| 18 | <b>Figure S18.</b> 2D representation of $[\text{CdCl}_2(\text{H}_4\text{Brsal-dag})]^-$ with the active site residues of DHFR from <i>E. coli</i> .                                                                                                                                                                        | S10 |
| 19 | <b>Table S1.</b> Crystal refinement parameters of the complexes $[\text{ZnCl}_2(\text{H}_4\text{Brsal-dag})]\text{H}_6\text{Brsal-dag}\cdot\text{DMF}\cdot\text{H}_2\text{O}$ ( <b>1</b> ) and $[\text{CdCl}_2(\text{H}_4\text{Brsal-dag})]\text{H}_6\text{Brsal-dag}\cdot\text{DMF}\cdot\text{H}_2\text{O}$ ( <b>2</b> ). | S11 |
| 20 | <b>Table S2.</b> The bond lengths (Å) and bond angles (°) of the complex $[\text{CdCl}_2(\text{H}_4\text{Brsal-dag})]\text{H}_6\text{Brsal-dag}\cdot\text{DMF}\cdot\text{H}_2\text{O}$ ( <b>2</b> ).                                                                                                                       | S12 |
| 21 | <b>Table S3.</b> Interaction parameters of the complex $[\text{CdCl}_2(\text{H}_4\text{Brsal-dag})]\text{H}_6\text{Brsal-dag}\cdot\text{DMF}\cdot\text{H}_2\text{O}$ ( <b>2</b> ).                                                                                                                                         | S13 |
| 22 | <b>Table S4.</b> The Frontier molecular orbital energies and calculated chemical reactivity parameters for the compounds.                                                                                                                                                                                                  | S14 |
| 23 | <b>Table S5.</b> Results of the inhibitory zones and the % antimicrobial activity of the complexes.                                                                                                                                                                                                                        | S14 |

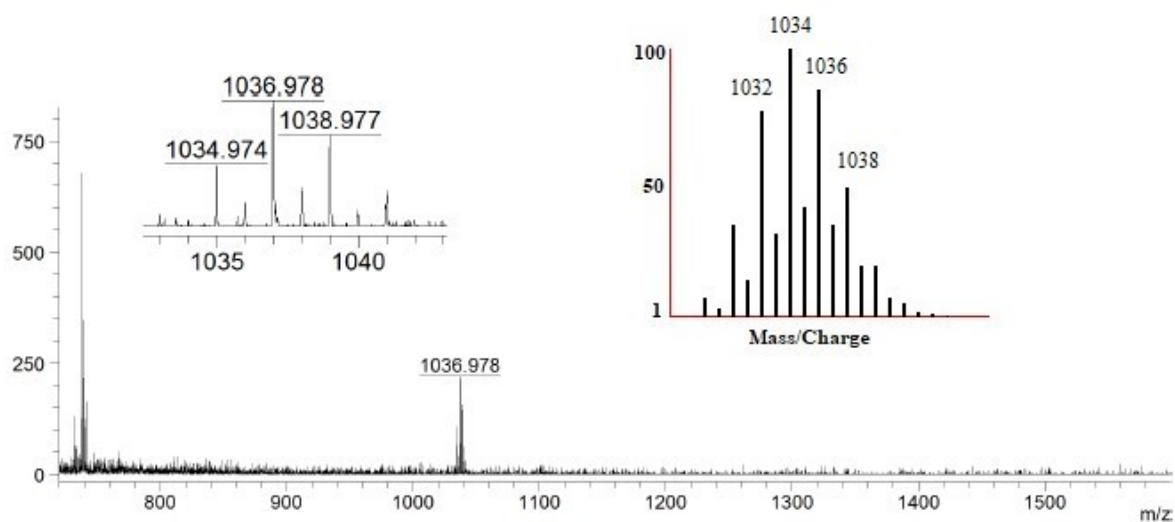

Figure S1. Mass spectrum of  $[\text{ZnCl}_2(\text{H}_4\text{Brsal-dag})]\text{H}_6\text{Brsal-dag}.\text{DMF}.\text{H}_2\text{O}$  with experimental and calculated isotopic patterns.

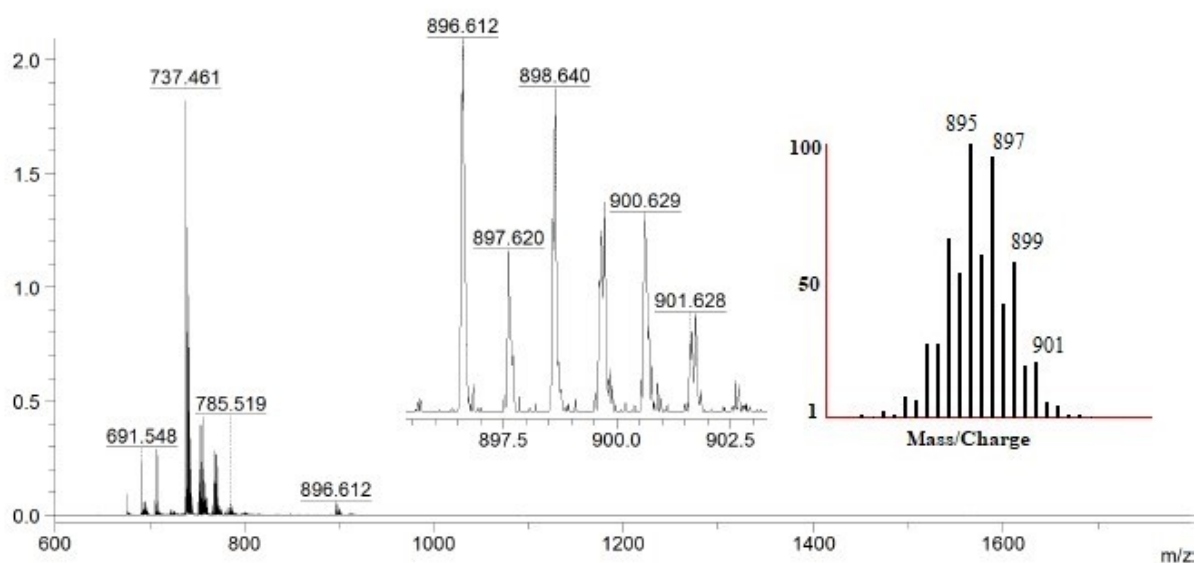

Figure S2. Mass spectrum of  $[\text{CdCl}_2(\text{H}_4\text{Brsal-dag})]\text{H}_6\text{Brsal-dag}.\text{DMF}.\text{H}_2\text{O}$  with experimental and calculated isotopic patterns.

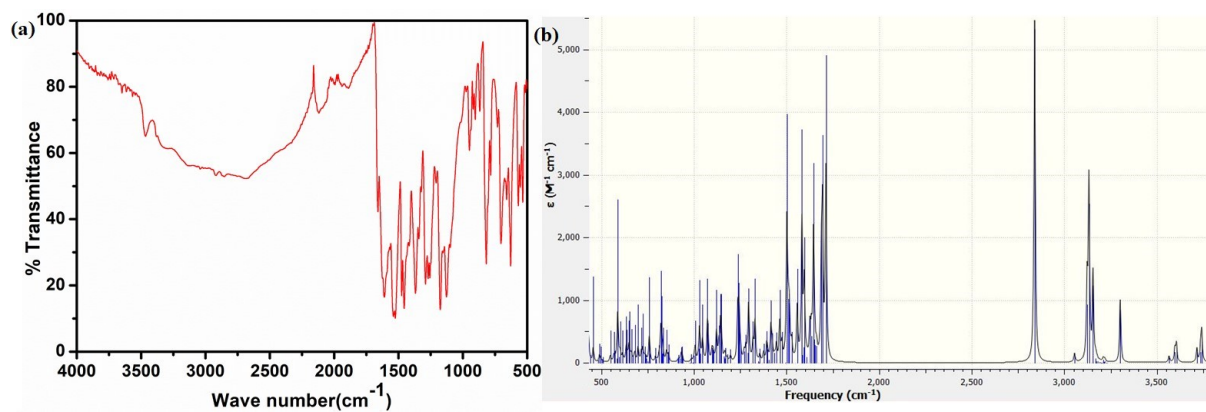

Figure S3. Experimental (a) and theoretical (b) IR spectra of the complex 1.

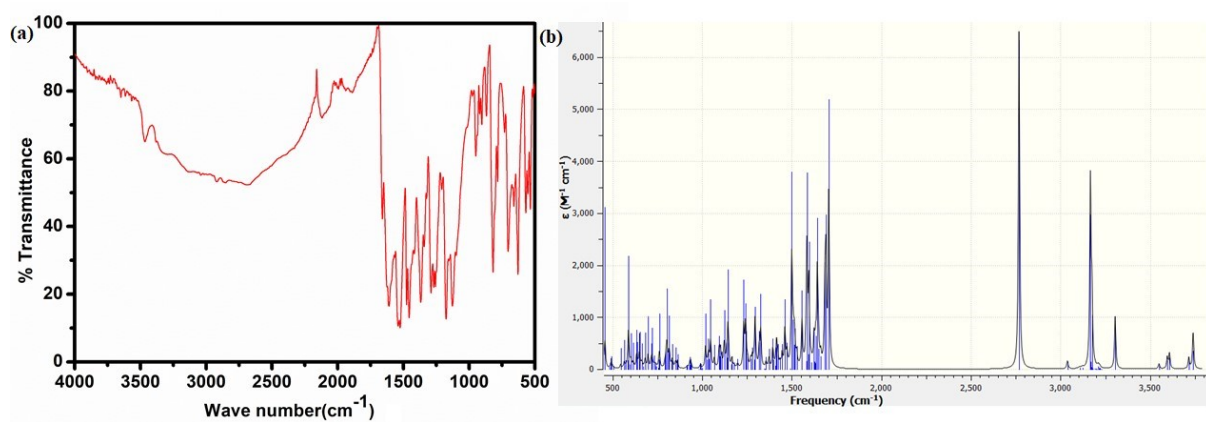

Figure S4. Experimental (a) and theoretical (b) IR spectra of the complex 2.

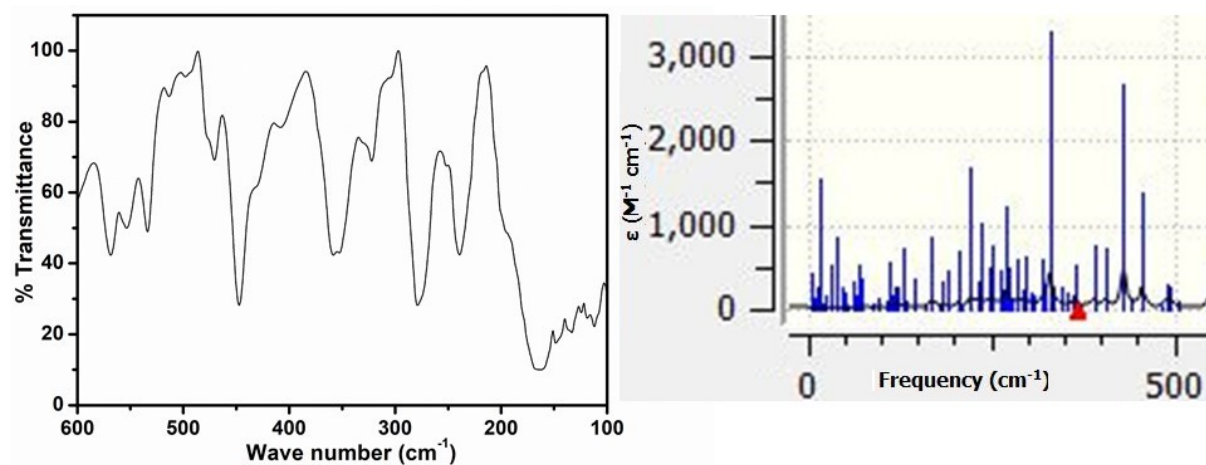

Figure S5. Experimental (a) and theoretical (b) Far IR spectra of the complex 1.

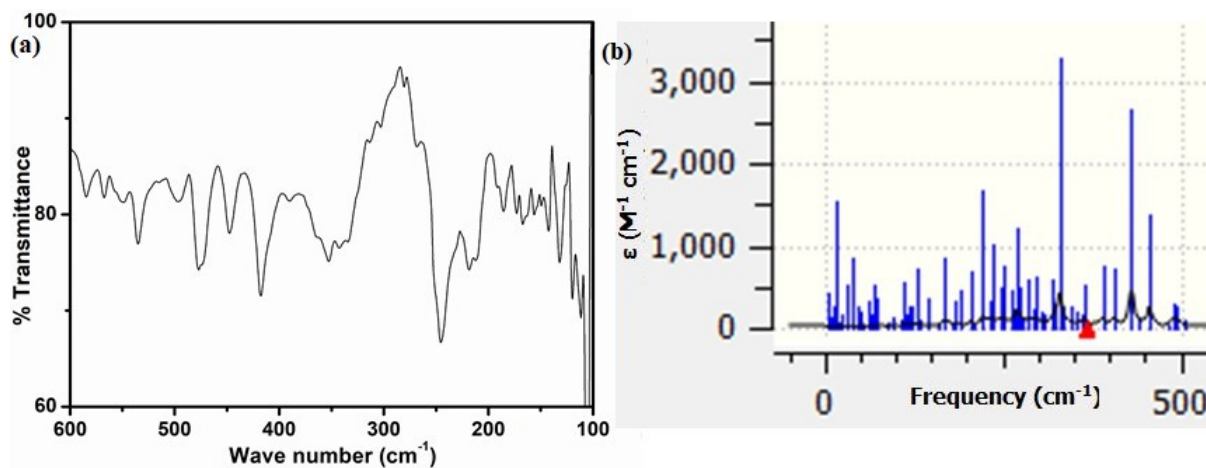

Figure S6. Experimental (a) and theoretical (b) Far IR spectra of the complex 2.

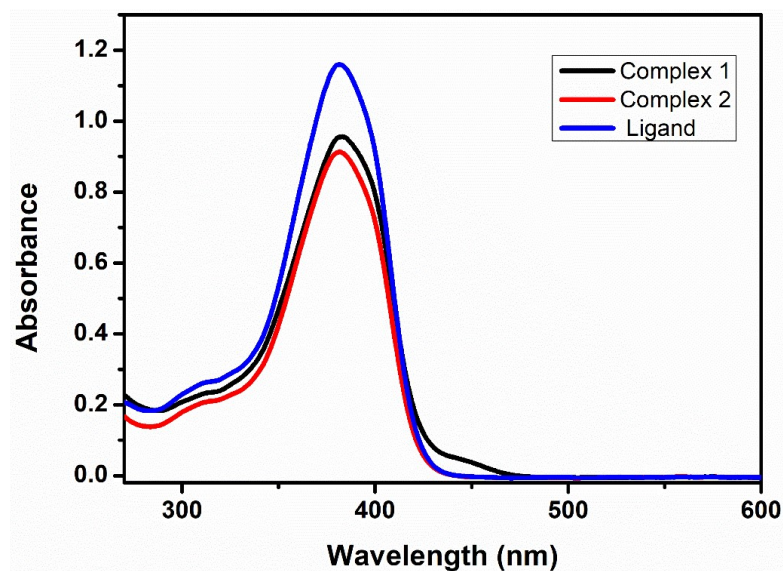

Figure S7. UV-vis spectra of the ligand, complex 1 and complex 2.

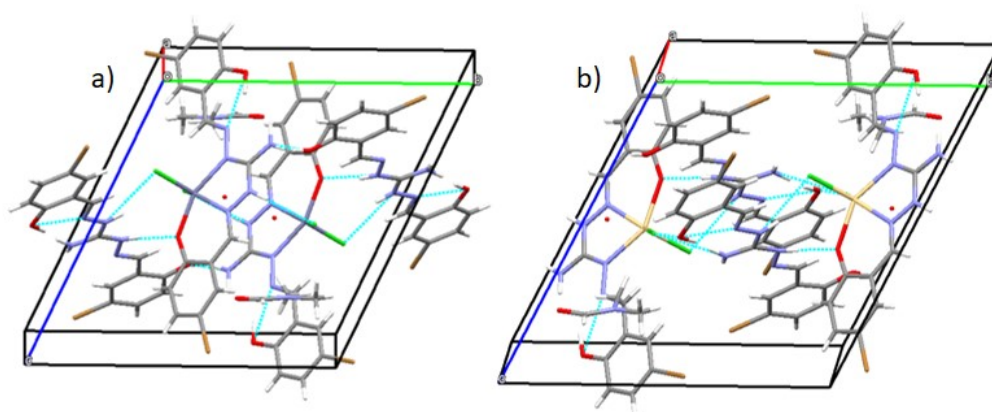

Figure S8. Unit cell packing diagrams of a) complex 1 and b) complex 2 along the 'a' axis, showing relevant hydrogen bonding interactions (blue dotted lines).

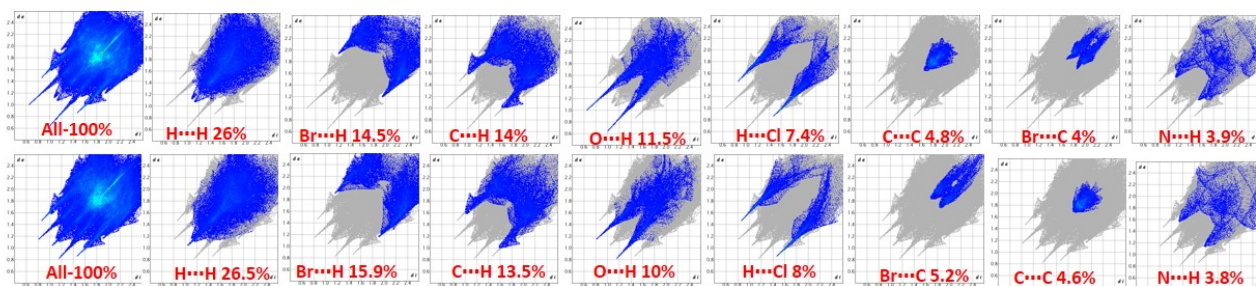

Figure S9. 2D Fingerprint plots showing the percentages of contacts contributed to the total Hirshfeld surface area of the complex 1 (below) and the complex 2 (above).

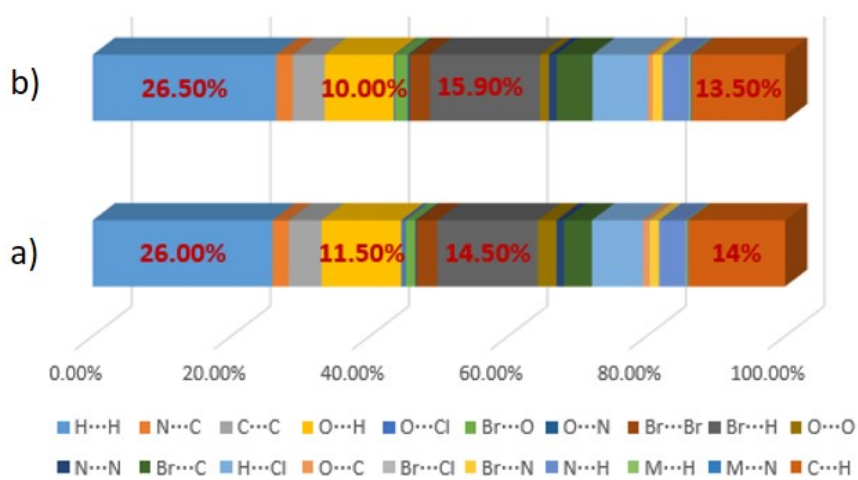

Figure S10. Relative contributions of various intermolecular contacts to the Hirshfeld surface area in a) complex 1 and b) complex 2.

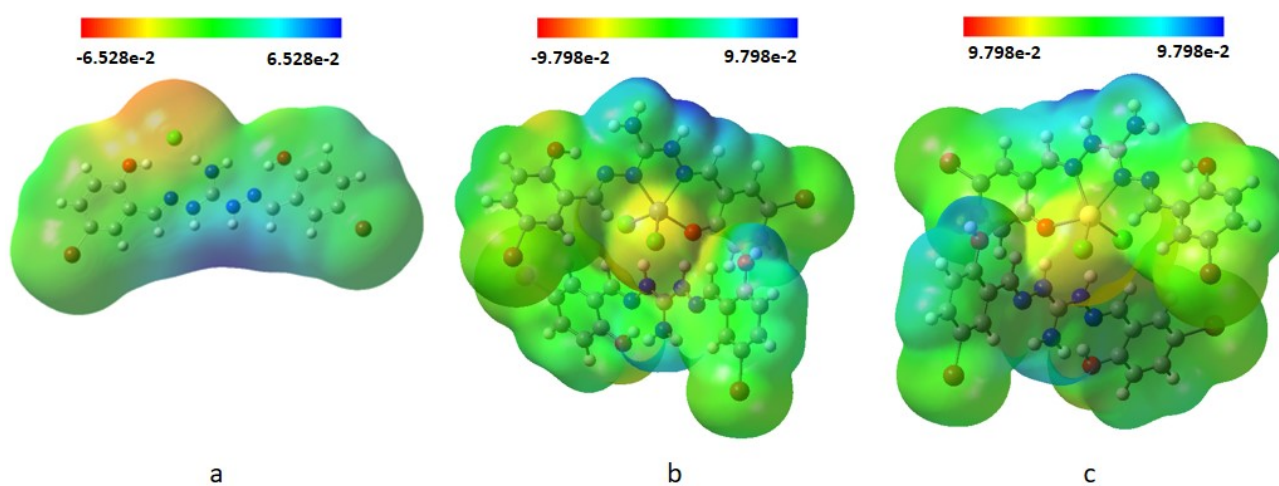

Figure S11. MEP plots for (a) ligand, (b) complex 1 and (c) complex 2.

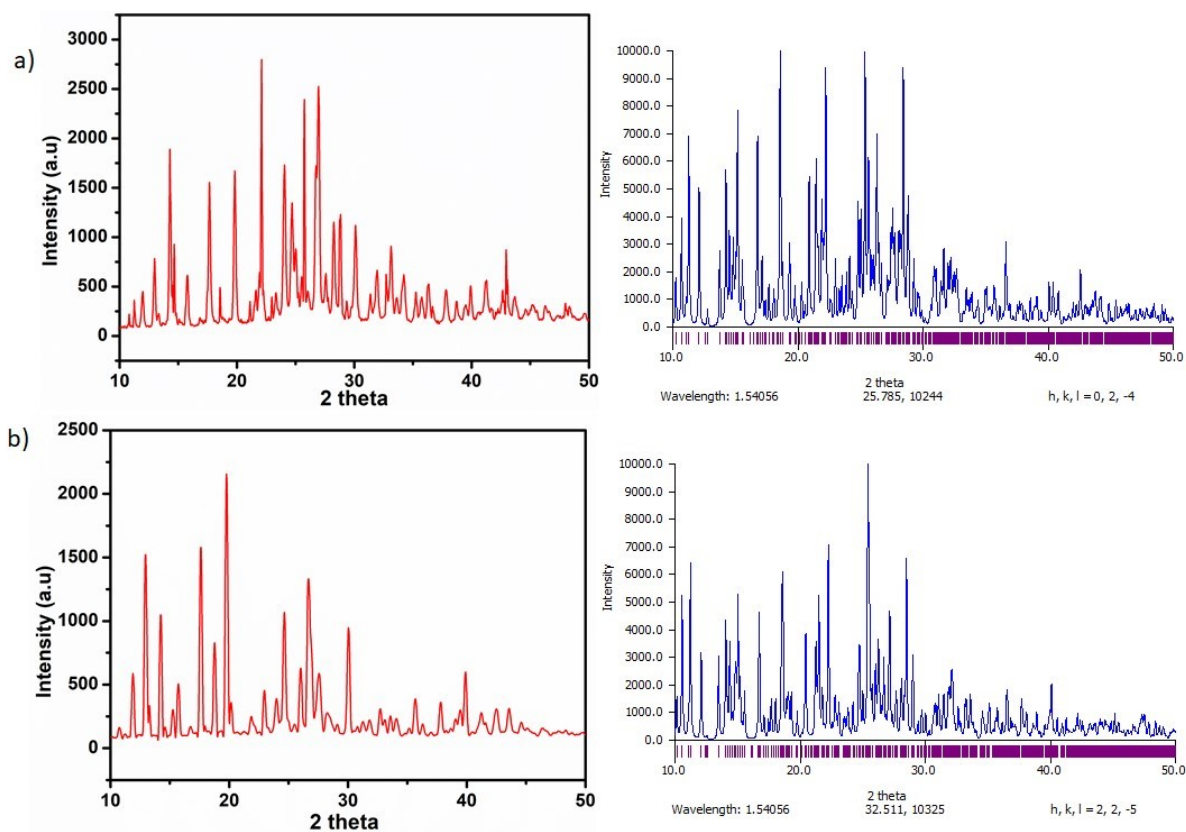

Figure S12. PXRD (left) and simulated PXRD pattern from SC-XRD (right) of (a) the complex 1 and (b) the complex 2.

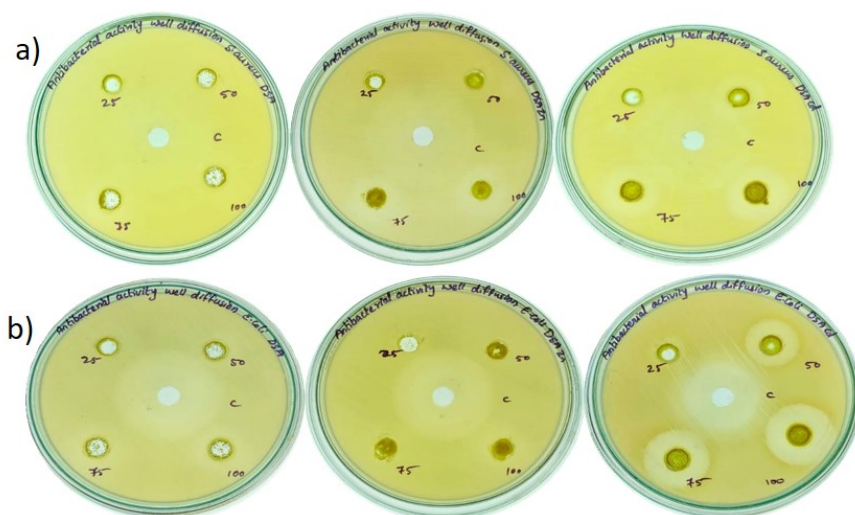

Figure S13. Zone of inhibition of (a) *S.aureus* (b) *E.coli* against ligand, complex 1 and complex 2.



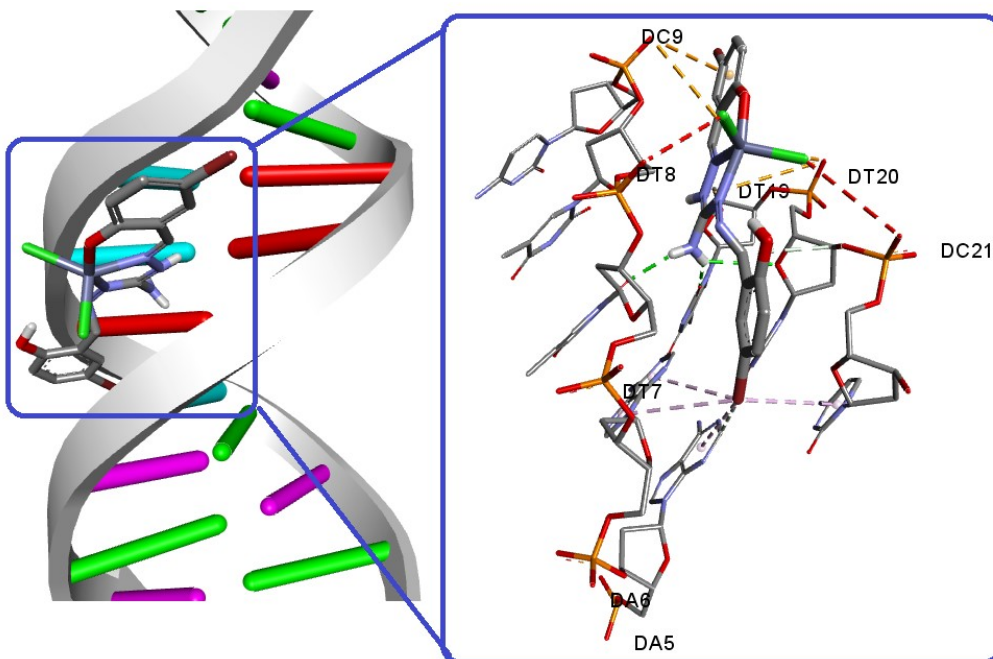

Figure S14. Binding mode of  $[\text{ZnCl}_2(\text{H}_4\text{Brsal-dag})]^-$  and its focused view of interactions with 1BNA.

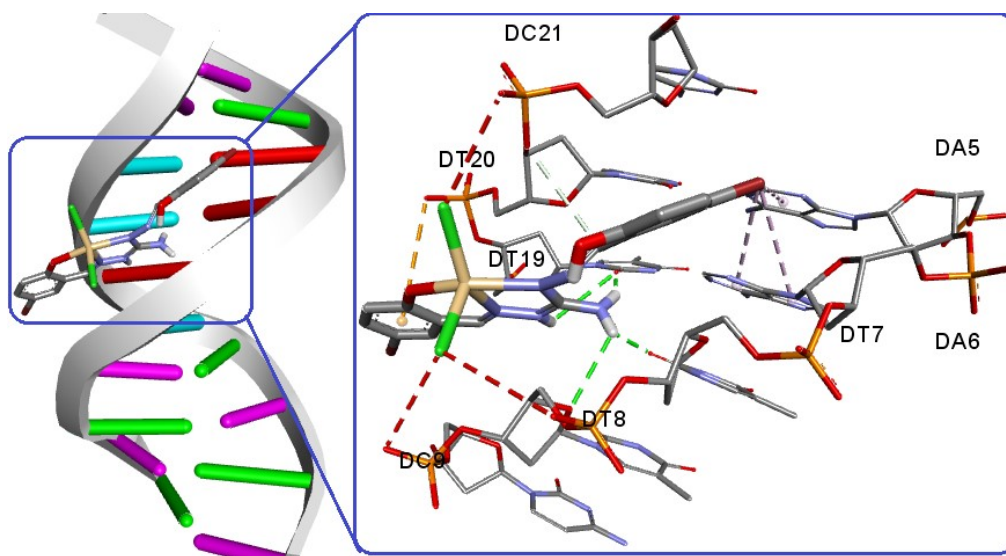

Figure S15. Binding mode of  $[\text{CdCl}_2(\text{H}_4\text{Brsal-dag})]^-$  and its focused view of interactions with 1BNA.

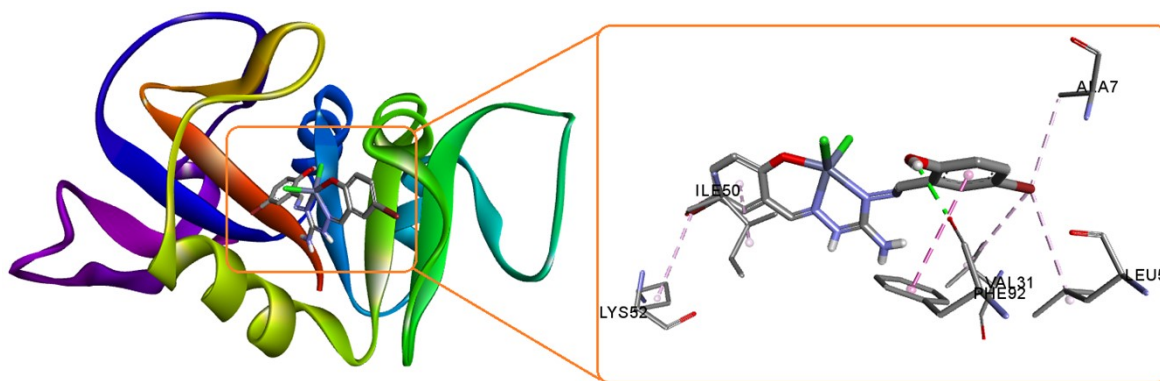

Figure S16. Binding mode of  $[ZnCl_2(H_4Brsal-dag)]^-$  and its focused view of interactions with DHFR from *S. aureus*.

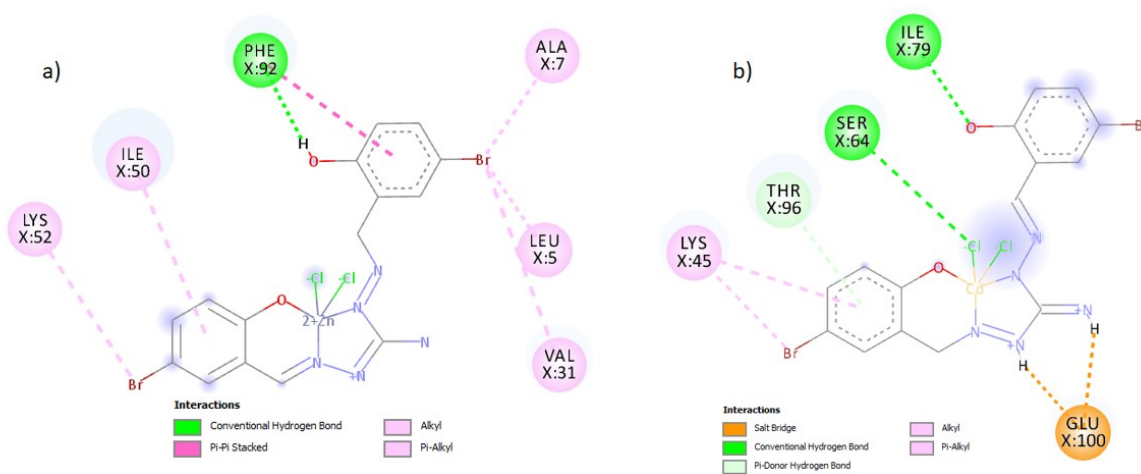

Figure S17. 2D representation of (a)  $[ZnCl_2(H_4Brsal-dag)]^-$  and (b)  $[CdCl_2(H_4Brsal-dag)]^-$  at the active site residues of DHFR from *S. aureus*.

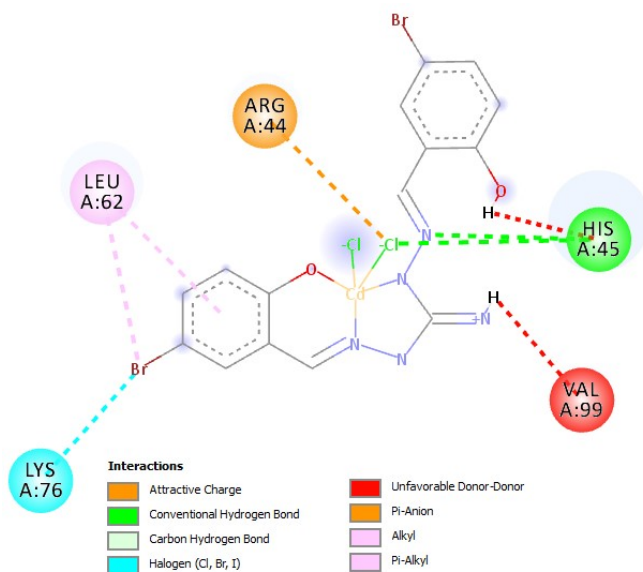

Figure S18. 2D representation of  $[CdCl_2(H_4Brsal-dag)]^-$  with the active site residues of DHFR from *E. coli*.

Table S1. Crystal refinement parameters of the complexes [ZnCl<sub>2</sub>(H<sub>4</sub>Brsal-dag)]H<sub>6</sub>Brsal-dag·DMF·H<sub>2</sub>O (**1**) and [CdCl<sub>2</sub>(H<sub>4</sub>Brsal-dag)]H<sub>6</sub>Brsal-dag·DMF·H<sub>2</sub>O (**2**).

| Parameters                         | [ZnCl <sub>2</sub> (H <sub>4</sub> Brsal-dag)]H <sub>6</sub> Brsal-dag·DMF·H <sub>2</sub> O                                  | [CdCl <sub>2</sub> (H <sub>4</sub> Brsal-dag)]H <sub>6</sub> Brsal-dag·DMF·H <sub>2</sub> O                                  |
|------------------------------------|------------------------------------------------------------------------------------------------------------------------------|------------------------------------------------------------------------------------------------------------------------------|
| CCDC number                        | 2259210                                                                                                                      | 2290289                                                                                                                      |
| Empirical Formula                  | C <sub>33</sub> H <sub>35</sub> Br <sub>4</sub> Cl <sub>2</sub> N <sub>11</sub> O <sub>6</sub> Zn                            | C <sub>33</sub> H <sub>35</sub> Br <sub>4</sub> CdCl <sub>2</sub> N <sub>11</sub> O <sub>6</sub>                             |
| Formula weight (M)                 | 1137.63                                                                                                                      | 1184.66                                                                                                                      |
| Temperature (T)                    | 295(2) K                                                                                                                     | 298(2) K                                                                                                                     |
| Wavelength (Mo/Cu Kα)              | 1.54178 Å                                                                                                                    | 0.71073 Å                                                                                                                    |
| Crystal system                     | triclinic                                                                                                                    | triclinic                                                                                                                    |
| Space group                        | <i>P</i> -1                                                                                                                  | <i>P</i> -1                                                                                                                  |
| Unit cell dimensions               | a=12.4293(3)Å α=115.0430(10)°<br>b = 13.9253(3)Å β= 99.3430(10)°<br>c = 14.0492(3)Å γ= 95.0030(10)°                          | a =12.3459(7) Å α=116.555(2)°<br>b =14.1549(9) Å β=99.070(2)°<br>c = 14.4164(9) Å γ=94.806(2)°                               |
| Volume V, Z                        | 2140.51(8) Å <sup>3</sup> , 2                                                                                                | 2191.2(2) Å <sup>3</sup> , 2                                                                                                 |
| Calculated density (ρ)             | 1.765 g/cm <sup>3</sup>                                                                                                      | 1.796 g/cm <sup>3</sup>                                                                                                      |
| Absorption coefficient, μ          | 6.792 mm <sup>-1</sup>                                                                                                       | 4.322 mm <sup>-1</sup>                                                                                                       |
| <i>F</i> (000)                     | 1124                                                                                                                         | 1160                                                                                                                         |
| Crystal size                       | 0.223 x 0.052 x 0.035 mm                                                                                                     | 0.305 x 0.196 x 0.124 mm                                                                                                     |
| Limiting Indices                   | -14≤h≤14,<br>-16≤k≤15,<br>-16≤l≤16                                                                                           | -15≤h≤15,<br>-17≤k≤17,<br>-17≤l≤17                                                                                           |
| Reflections collected              | 77726                                                                                                                        | 100702                                                                                                                       |
| Independent Reflections            | 7857[R(int)=0.1049]                                                                                                          | 8307[R(int)=0.0623]                                                                                                          |
| Refinement method                  | Full-matrix least-squares on F <sup>2</sup>                                                                                  | Full-matrix least-squares on F <sup>2</sup>                                                                                  |
| Data / restraints / parameters     | 7857/8/555                                                                                                                   | 8307/10/554                                                                                                                  |
| Goodness-of-fit on F <sup>2</sup>  | 1.065                                                                                                                        | 1.084                                                                                                                        |
| Final <i>R</i> indices [I > 2σ(I)] | R <sub>1</sub> = 0.0510, wR <sub>2</sub> = 0.1046                                                                            | R <sub>1</sub> = 0.0424, wR <sub>2</sub> = 0.0990                                                                            |
| <i>R</i> indices (all data)        | R <sub>1</sub> = 0.1142, wR <sub>2</sub> = 0.1250                                                                            | R <sub>1</sub> = 0.0700, wR <sub>2</sub> = 0.1182                                                                            |
| Weighing Scheme                    | 'w=1/[s <sup>2</sup> (Fo <sup>2</sup> )+(0.0432P) <sup>2</sup> +4.6321P], where<br>P=(Fo <sup>2</sup> +2Fc <sup>2</sup> )/3' | 'w=1/[s <sup>2</sup> (Fo <sup>2</sup> )+(0.0442P) <sup>2</sup> +5.7744P], where<br>P=(Fo <sup>2</sup> +2Fc <sup>2</sup> )/3' |
| Largest difference peak and hole   | 0.725 and -0.705 e Å <sup>-3</sup>                                                                                           | 0.925 and -1.111 e Å <sup>-3</sup>                                                                                           |

$$R_1 = \sum ||F_o| - |F_c|| / \sum |F_o|; wR_2 = [\sum w(F_o^2 - F_c^2)^2 / \sum w(F_o^2)^2]^{1/2}$$

Table S2. The bond lengths (Å) and bond angles (°) of the complex [CdCl<sub>2</sub>(H<sub>4</sub>Brsal-dag)]H<sub>6</sub>Brsal-dag.DMF.H<sub>2</sub>O (**2**).

| Bond lengths (Å) |            | Bond angles (°) |            |
|------------------|------------|-----------------|------------|
| Cd1–O1           | 2.216(3)   | O1–Cd1–N1       | 79.12(14)  |
| Cd1–N4           | 2.287(4)   | O1–Cd1–N4       | 148.74(13) |
| Cd1–N1           | 2.327(4)   | N1–Cd1–N4       | 70.86(15)  |
| Cd1–Cl1          | 2.4861(13) | O1–Cd1–Cl1      | 98.22(10)  |
| Cd1–Cl2          | 2.4884(13) | N1–Cd1–Cl1      | 111.96(11) |
| N4–N5            | 1.390(6)   | N4–Cd1–Cl1      | 100.82(11) |
| C8–N3            | 1.314(6)   | O1–Cd1–Cl2      | 91.84(10)  |
| C8–N4            | 1.336(7)   | N1–Cd1–Cl2      | 137.33(11) |
| N3–C8            | 1.355(7)   | N4–Cd1–Cl2      | 104.22(11) |
| N1–N2            | 1.379(6)   | Cl1–Cd1–Cl2     | 110.59(4)  |
| N1–C7            | 1.283(7)   |                 |            |
| O1–C1            | 1.326(6)   |                 |            |
| O2–C15           | 1.354(7)   |                 |            |
| Br2–C12          | 1.904(6)   |                 |            |
| C4–Br1           | 1.914(5)   |                 |            |

Table S3. Interaction parameters of the complex [CdCl<sub>2</sub>(H<sub>4</sub>Brsal-dag)]H<sub>6</sub>Brsal-dag.DMF.H<sub>2</sub>O (2).

| Hydrogen bonding interactions  |         |             |           |               |
|--------------------------------|---------|-------------|-----------|---------------|
| D–H ... A                      | D–H (Å) | H ... A (Å) | D--A (Å)  | D–H ... A (°) |
| N8–H8NB ... N6                 | 0.83(4) | 2.45(4)     | 2.736(6)  | 101(3)        |
| N8–H8NB ... Cl(2) <sup>a</sup> | 0.83(4) | 2.49(4)     | 3.267(5)  | 156(3)        |
| N8–H8NA ... N10                | 0.84(3) | 2.31(6)     | 2.667(7)  | 106(5)        |
| N8–H8NA ... Cl(1) <sup>a</sup> | 0.84(3) | 2.66(4)     | 3.370(5)  | 143(5)        |
| N2–H2N ... Cl(2) <sup>b</sup>  | 0.83(6) | 2.63(3)     | 3.357(6)  | 147(6)        |
| N2–H2N ... O(6) <sup>b</sup>   | 0.83(6) | 2.51(8)     | 3.135(15) | 132(6)        |
| O2–H2O ... N5                  | 0.96(5) | 1.94(5)     | 2.714(6)  | 136(6)        |
| N3–H3NA ... O(3) <sup>b</sup>  | 0.84(6) | 2.12(6)     | 2.906(9)  | 156(6)        |
| O3–H3O ... O(5)                | 0.95(8) | 1.74(9)     | 2.627(13) | 154(7)        |
| N3–H3NB ... N5                 | 0.84(5) | 2.30(8)     | 2.639(8)  | 104(6)        |
| O4–H4O ... N6                  | 0.96(7) | 1.94(8)     | 2.755(7)  | 141(6)        |
| N7–H7N ... Cl(1)               | 0.84(6) | 2.44(5)     | 3.226(4)  | 157(5)        |
| N9–H9N ... O(1)                | 0.83(5) | 1.86(5)     | 2.683(7)  | 175(5)        |
| C9–H9 ... Cl2                  | 0.93    | 2.75        | 3.591(5)  | 150           |
| C22–H22 ... O3                 | 0.93    | 2.45        | 2.767(8)  | 100           |
| C32–H32A ... O5                | 0.96    | 2.37        | 2.81(3)   | 108           |

D = donor, A = acceptor, Equivalent position codes a = 1-x,1-y,1-z; b = 1-x,2-y,1-z;

| $\pi$ ... $\pi$ interactions |                |              |             |
|------------------------------|----------------|--------------|-------------|
| Cg ... Cg                    | Cgv ... Cg (Å) | $\alpha$ (°) | $\beta$ (°) |
| Cg(1) ... Cg(1) <sup>a</sup> | 3.597(3)       | 0.0(2)       | 15.6        |
| Cg(1) ... Cg(2) <sup>a</sup> | 3.784(3)       | 6.11(19)     | 28.7        |
| Cg(2) ... Cg(1) <sup>a</sup> | 3.784(3)       | 6.11(19)     | 22.6        |
| Cg(4) ... Cg(4) <sup>b</sup> | 3.895(4)       | 0.0(3)       | 26.8        |
| Cg(5) ... Cg(6) <sup>c</sup> | 3.667(3)       | 9.3(3)       | 11.3        |
| Cg(6) ... Cg(5) <sup>c</sup> | 3.667(3)       | 9.3(3)       | 20.2        |

Equivalent position codes: a= 1-x,2-y,1-z ;b= 1-x,1-y,-z ; c= 1-x,1'-y,1-z

| C–X ... $\pi$ interactions     |              |              |                |
|--------------------------------|--------------|--------------|----------------|
| C–X ... Cg                     | X ... Cg (Å) | C ... Cg (Å) | C–X ... Cg (°) |
| C28–H28 ... Cg(3) <sup>a</sup> | 2.60         | 3.501(7)     | 163            |

Equivalent position codes: a= -x,1-y,1-z; Cg(3)= C(1), C(2), C(3), C(4), C(5), C(6).

Table S4. The Frontier molecular orbital energies and calculated chemical reactivity parameters for the compounds.

| Energy parameters (eV)                    | H <sub>5</sub> Brsal-dag.HCl | Complex 1  | Complex 2  |
|-------------------------------------------|------------------------------|------------|------------|
| HOMO                                      | -5.93                        | -5.92      | -5.93      |
| HOMO-1                                    | -6.21                        | -6.11      | -6.61      |
| LUMO                                      | -3.02                        | -2.47      | -2.48      |
| LUMO+1                                    | -2.16                        | -2.32      | -2.29      |
| E <sub>HOMO</sub> -E <sub>LUMO</sub> : ΔE | 2.90                         | 3.45       | 3.45       |
| Ionization Energy, I                      | 5.93                         | 5.92       | 5.93       |
| Electron Affinity, A                      | 3.02                         | 2.47       | 2.48       |
| Chemical hardness, η                      | 1.45                         | 1.72       | 1.72       |
| Electronegativity, χ                      | 4.47                         | 4.19       | 4.20       |
| Chemical potential, μ                     | -4.47                        | -4.19      | -4.20      |
| Electrophilicity, ω                       | 6.90                         | 5.10       | 5.12       |
| Total Energy                              | -4896645.56                  | -361630.84 | -361153.39 |
| Global softness, σ (eV <sup>-1</sup> )    | 0.68                         | 0.58       | 0.68       |
| Nucleophilicity, ε (eV <sup>-1</sup> )    | 0.14                         | 0.19       | 0.19       |
| Dipole moment (Debye)                     | 12.94                        | 8.24       | 8.17       |

Table S5. Results of the inhibitory zones and the % antimicrobial activity of the complexes.

| Bacterial strains | Conc.(μL) | Complex 1     | Complex 2       | Ciprofloxacin |
|-------------------|-----------|---------------|-----------------|---------------|
| <i>E.coli</i>     | 25        | -             | 11mm, (52.3%)   | 21mm, (100%)  |
|                   | 50        | -             | 20mm, (95.23%)  |               |
|                   | 75        | -             | 24mm, (114.28%) |               |
|                   | 100       | -             | 25mm, (119.04%) |               |
| <i>S.aureus</i>   | 25        | -             | -               | 40mm, (100%)  |
|                   | 50        | -             | 12mm, (30%)     |               |
|                   | 75        | 10mm, (25%)   | 12mm, (30%)     |               |
|                   | 100       | 11mm, (27.5%) | 13mm, (32.5%)   |               |
